# Supplementary material
Source: publisher site journal article supplement (https://www.degruyter.com/publication/isbn/9783839444368/downloadAsset/9783839444368_Leseprobe.pdf)
Supplement: Supplementary file 1 [file 9783839444368_Leseprobe.pdf]

Steffi Hobuß, Ina Khiari-Loch,  
Moez Maataoui (Hg.)

# TUNESISCHE TRANS- FORMATIONEN

Feminismus – Geschlechterverhältnisse – Kultur.  
Tunesisch-deutsche Perspektiven

[transcript] GenderStudies

**Aus:**

*Steffi Hobuß, Ina Khiari-Loch, Moez Maataoui (Hg.)*

## **Tunesische Transformationen**

**Feminismus – Geschlechterverhältnisse – Kultur.  
Tunesisch-deutsche Perspektiven**

November 2019, 388 S., kart., 10 Farbabb.

39,99 € (DE), 978-3-8376-4436-4

E-Book:

PDF: 39,99 € (DE), ISBN 978-3-8394-4436-8

Die tunesische Gesellschaft stand vor allem während der Revolution von 2011 im Fokus europäischen Interesses. Doch wie haben sich die Kultur und vor allem die Geschlechterverhältnisse dort überhaupt entwickelt?

Diesen Fragen geht der Band mit zwei Blickrichtungen nach: Zum einen wird die Transformation der Geschlechterverhältnisse in der Geschichte Tunesiens seit der Unabhängigkeit, der Diktatur und der Revolution 2011 bis zur Gegenwart analysiert. Zum anderen werden auf theoretisch-begrifflicher Ebene Transformationen des Feminismus und der Geschlechterbegriffe von einem Denken der Differenz und einer Politik der Repräsentation hin zu neueren dekonstruktiven und postkolonialen Gendertheorien erforscht. Betrachtet werden dabei vor allem die Bereiche der Künste, der Populärkultur sowie der Mode als wesentliche Medien der Transformation.

**Steffi Hobuß** (Dr. phil.), geb. 1964, lehrt und forscht an der Leuphana Universität Lüneburg und leitet dort das Leuphana College. Sie studierte Philosophie und Germanistik und promovierte in Philosophie an der Universität Bielefeld mit einer Arbeit über Wittgenstein. Für ihre Lehre wurde sie 2009, 2011 und 2015 mit Preisen ausgezeichnet und war 2010 Gastprofessorin an der Karlstads Universität, Schweden. Sie habilitiert zur Theorie der visuellen Wahrnehmung bei Platon und Aristoteles.

**Ina Khiari-Loch** (M.A.) ist Assistentin am Institut Supérieur des Sciences Humaines Medenine, Tunesien, im Fachbereich Angewandtes Deutsch und Deutsche Sprache und Literatur. Sie promoviert an der Georg-August-Universität Göttingen.

**Moez Maataoui** (Dr. phil.), geb. 1975, lehrt in Tunesien an den Universitäten Tunis, Gafsa und Manouba. Ihre Forschungsschwerpunkte sind Politolinguistik, Phraseologie und Kontrastive Linguistik (Arabisch/Deutsch).

Weiteren Informationen und Bestellung unter:

[www.transcript-verlag.de/978-3-8376-4436-4](http://www.transcript-verlag.de/978-3-8376-4436-4)

# Inhalt

---

## **Transformation – Kultur – Geschlecht**

Eine Einleitung

Katharina Alexi, Steffi Hobuß, Ina Khiari-Loch, Moez Maataoui | 9

## **POSTKOLONIALE ANSÄTZE ZU GESCHLECHT AUS TUNESIEN**

### **Soumaya Mestiri im Gespräch über ihr Buch**

»Décoloniser le féminisme«

Steffi Hobuß und Martina Möller | 21

### **Die Revolution im Lichte des dekolonialen Feminismus**

Das Beispiel Tunesien

Soumaya Mestiri | 39

### **Komplementarität oder Geschlechtergleichheit:**

**Über die Debatte zur neuen tunesischen Verfassung 2014**

Lotfi Mathlouthi | 61

### **Krise der Männlichkeit**

Normativer Widerstand und androgyne Perspektive

Mohamed Adel Mtimet | 69

### **Die Transformation von Geschlechterverhältnissen im postrevolutionären Tunesien**

Amel Grami | 83

## **FEMINISMUS/STAATSFEMINISMUS IN TUNESIEN: GESCHICHTE, ERBE UND FOLGEN**

### **Die tunesische Frauenbewegung und der Kampf um die Frauenrechte**

Hafidha Chekir | 101

**Der staatliche Frauediskurs in Tunesien in der Ära Ben Ali:  
Wandel und Kontinuitäten am Beispiel der Zeitschrift *InfoCREDIF***  
Ina Khiari-Loch | 119

## **GESCHLECHT IN TUNESIEN IN ÖFFENTLICHEN DISKURSEN UND SPRACHLICHEN ALLTAGSPRAKTIKEN**

**Geschlechterkonstruktionen in Verpackungsaufschriften  
von Haushaltspflegeprodukten**  
Moez Maataoui | 155

**Äußerungen zum Thema ›Frau‹ im tunesischen Pressediskurs  
nach 2010/2011**  
Majdi Chaouachi | 177

**Performative Initiativen, Öffentlicher Raum, Karneval**  
Dimensionen der Performativen Demokratie im Rahmen  
der Tunesischen Revolution 2010/11  
Imke Horstmannshoff | 191

## **DEUTSCHE PERSPEKTIVEN AUF GESCHLECHT IN TUNESIEN**

**Transformation repräsentativer Ordnungen?**  
Der deutsche Pressediskurs um protestierende Frauen in Tunesien  
Lina Brink | 217

**Genderspezifische Förderung durch deutsche politische Stiftungen  
in Tunesien: eine Bestandsaufnahme**  
Abir Tarssim | 233

**Zeitgenössische Protestmusik und Geschlecht in Tunesien –  
journalistische und wissenschaftliche Erzählungen**  
Katharina Alexi | 245

# **GESCHLECHTERVERHÄLTNISSE IN KUNST, LITERATUR UND FILM**

## **Ägyptische Finsternis**

Gewaltverhältnisse und Subjektkonstitution im »Buch Franza«  
von Ingeborg Bachmann  
Sven Kramer | 271

## **Frauenfiguren und Geschlechterverhältnisse in Shukri Mabkhouts Debütroman *Ettalyani***

Imen Taleb | 295

## **Narration und Geschlecht in ausgewählten Erzählwerken der tunesischen Autorinnen Amel Mokhtar und Hayat Rais**

Idris Chouk | 315

## **Erinnerung, Dezentrierung und die Überschreitung von Geschlechtergrenzen in Rochdi Belgasmis Tanzperformance *Oueld Jellaba***

Steffi Hobuß | 341

## **Genderperspektiven im tunesischen Film**

Malek Ouakaoui | 353

## **Kunst in Transformation – das *Dream City*-Festival als Heterotopie**

Nina Glaab | 369

**Autor\*innen** | 383

# Transformation – Kultur – Geschlecht

Eine Einleitung

---

*Katharina Alexi, Steffi Hobuß, Ina Khiari-Loch, Moez Maataoui*

## »TRANSFORMATION – KULTUR – GESCHLECHT«: DAS PROJEKT

Im DAAD geförderten Forschungsprojekt »Transformation – Kultur – Geschlecht« (2016-2019) ging es zentral darum, im Kontext des demokratischen Transformationsprozesses in Tunesien nach der Revolution von 2010/2011 und der Verfassungsgebung Anfang 2014 eine nachhaltige Hochschulpartnerschaft zwischen der Leuphana Universität Lüneburg und der Université de La Manouba sowie dem Institut Supérieur des Sciences Humaines de Médenine/Univeristé de Gabès in Tunesien aufzubauen, zu fördern und zu konsolidieren. Das Thema *Geschlecht und Gender in Tunesien* war, wie sich im Laufe der Arbeit herausstellte, sehr gut zum Aufbau der Zusammenarbeit und der Bildung einer Forschungsgruppe geeignet.

Während durch deutsche und europäische Medien nach wie vor häufig pauschalisierende Meinungen über die Situation von Frauen in den arabischen Ländern (re)produziert werden, ist die Realität wesentlich komplexer.<sup>1</sup> In Tunesien spielten die Emanzipation der Frauen und die Berufung auf Geschlechtergerechtigkeit im Rahmen der Modernisierungsdiskurse seit der Unabhängigkeit eine

---

1 Gerhard, Ute/Jansen, Mechthild M./Rumpf, Mechthild: Facetten islamischer Welten. Geschlechterordnungen, Frauen- und Menschenrechte in der Diskussion, Bielefeld: transcript Verlag 2003; Pinn, Irmgard/Wehner, Marlies: EuroPhantasien. Die islamische Frau aus westlicher Sicht, Duisburg: DISS, Duisburger Inst. für Sprach- und Sozialforschung 1995.

besondere Rolle. Der Staatsfeminismus war ein besonderes Aushängeschild Tunesiens, aus dem die Regime Bourguibas und Ben Alis Nutzen ziehen konnten.<sup>2</sup>

»Staatsfeminismus« meint hier, dass dem Thema der Frauenrechte besondere staatliche Aufmerksamkeit zuteilwurde, ohne dass es aber um die grundlegende Änderung der Geschlechterverhältnisse ging.<sup>3</sup> Sowohl im Ausland als auch im Inland ist trotzdem die Reklamation der Emanzipation der Frauen in Tunesien als Merkmal eines Staates wahrgenommen worden, der modern und weltoffen ist und sich gegen die Einflüsse von Islamismus und Fundamentalismus stark macht. Die staatliche Monopolisierung des Frauenrechtsdiskurses wie viele der Berufungen auf Modernität und Demokratie waren aber auch eine »Maskerade«,<sup>4</sup> die einerseits zivilgesellschaftliches Engagement abwerten und unsichtbar machen und andererseits Unrecht, Gewalt und Menschenrechtsverstöße überdecken sollte. Islamistische Kräfte haben dadurch Sprechpositionen gewonnen, dass sie besonders unter der Epoche der Diktatur gelitten haben. Daher ist es in Tunesien durch die spezielle historische Situation nicht mehr ohne weiteres möglich, sich affirmativ und ohne historisches Bewusstsein auf die Frauenrechte und Geschlechtergerechtigkeit zu berufen.

Einigen Aspekten dieser komplexen Konstellation, wie sie im Projekt »Transformation – Kultur – Geschlecht« untersucht wurden, widmet sich dieser Band. Dabei werden *Transformationen* in mehrfacher Hinsicht in den Blick genommen: Erstens stellen die gesellschaftlichen Transformationsprozesse immer wieder den Ausgangspunkt der Überlegungen dar. Zweitens werden die Transformationen der Geschlechterverhältnisse in der Geschichte Tunesiens über die Unabhängigkeit und die Phasen der Diktatur, die Revolution 2011 und den Verfassungsprozess bis zur Gegenwart in ausgewählten Beispielen beleuchtet, und drittens geht es auf theoretisch-begrifflicher Ebene um Transformationen des Feminismus und der Geschlechterbegriffe im Spannungsfeld zwischen einem

---

2 Vgl. I. Khiari-Loch, »Frauen in Tunesien zwischen Staatsfeminismus und neuem islamischen Bewusstsein – Das Kopftuch als Symbol des Islamismus oder der Freiheit«, in: Human Law. Actes du colloque sur la pédagogie et la culture des droits de l'Homme, Cottbus-Medenine 2013, S. 105; sowie El-Ouerghemmi, Nadia und Steffi Hobuß: Sprachliche Resignifikation im Kontext der Diktatur. Der Begriff der Frauenrechte in Tunesien, erscheint in: Sarhan Dhoubi (Hg.): Philosophieren in der Diktatur, Weilerswist: Velbrück 2019.

3 Zum Begriff des Staatsfeminismus vgl. Weber, Anne F.: Staatsfeminismus und autonome Frauenbewegung in Tunesien (Mitteilungen, Bd. 62), Hamburg: Dt. Orient-Institut 2001, S. 17-18.

4 I. Khiari-Loch, Frauen in Tunesien, S. 105.

Denken der Differenz, Politiken der Repräsentation und dekonstruktiven Gendertheorien. Damit bildet der Zusammenhang von Transformation und *Geschlecht* den Fokus des Projekts, und es kann z.B. gefragt und diskutiert werden, welcher ein postkolonialer Feminismus und/oder Genderbegriff inklusive der Repräsentation von LGBTQI\*-Gruppen für Tunesien ein adäquates Modell wäre. Der Begriff der *Kultur* benennt die Gegenstandsbereiche: Seit der Revolution 2011 und während der dreijährigen Übergangsphase bis zur Annahme einer Verfassung im Februar 2014 waren die Zivilgesellschaft und ihre zugehörigen kulturellen Praktiken entscheidend für die Entwicklungen in Tunesien. Deshalb werden Beiträge aus dem Bereich der Künste einschließlich der Literatur, populärkulturellen Medien, Social Media, politische, philosophische, zivilgesellschaftliche und religiöse Diskurse, Bekleidungsordnungen und Mode als wesentliche Medien der Transformation berücksichtigt. Die Analyse kultureller Praktiken kann dazu beitragen, Feminismus und/oder Geschlechtergerechtigkeit zeitgemäß, dekolonial und kontextbezogen zu deuten. Damit handelt es sich um ein genuin kulturwissenschaftliches interdisziplinäres Projekt.

Entsprechend der interdisziplinären Zusammensetzung der Forschungsgruppe versammelt dieser Band Beiträge aus den folgenden Disziplinen und/oder Forschungsfeldern: Philosophie (vor allem Philosophie der Geschlechterkonstruktion, Philosophie der Menschen- und Frauenrechte, Ethik, politische Philosophie), Feministische Theorie, gender und masculinity studies, Germanistik (Literaturwissenschaft und Linguistik), Ethnologie, Arabistik, Medienwissenschaft, Politikwissenschaft. Exemplarische Fragestellungen lauten: Inwiefern und wo gab es Widersprüche und Widerstand gegen die staatsfeministische Instrumentalisierung feministischer Diskurse? Welche Kontinuitäten und/oder Diskontinuitäten lassen sich in den unterschiedlichen Modernisierungsdiskursen beschreiben? Welche Transformationen der Geschlechterverhältnisse lassen sich für welche Zeiträume feststellen? In welchen Diskursen und Begriffen werden sie verhandelt? In welchen Kontexten und auf welche Weisen wird das Verhältnis von Islam und Geschlecht verhandelt? In welchen Kontexten und auf welche Weise erfolgen Berufungen auf Menschen- und besonders Frauenrechte? Welche Unterschiede bestehen hinsichtlich dieser Fragen zwischen den unterschiedlichen tunesischen Regionen, besonders zwischen Nord- und Südtunesien? Gibt es geschlechterspezifische Anrufungen bestimmter Demokratiebegriffe (z.B. repräsentative, performative oder radikale Demokratie in feministischen Kontexten)? Hat die Erinnerung an die Diktaturperioden und Umbrüche geschlechterspezifische Merkmale? Welche unterschiedlichen Feminismusbegriffe werden in den Diskursen verwendet und/oder können zur Analyse herangezogen werden?



## ÜBERSICHT ÜBER DIE BEITRÄGE

Das *erste Kapitel* »Postkoloniale Ansätze zu Geschlecht aus Tunesien« bezieht sich gleich zweimal auf die Monografie »Décoloniser le féminisme« der Philosophin Soumaya Mestiri. Den Auftakt bildet ein Gespräch mit Mestiri, geführt von Steffi Hobuß und Martina Möller, das grundlegende Fragen zur postkolonialen feministischen Philosophie aufwirft und beantwortet. Die Herausgeber\*innen freuen sich besonders, im Anschluss daran eine erstmalige Übersetzung des vierten Kapitels aus Mestiris Buch bereitstellen zu können. In »Die Revolution im Lichte des dekolonialen Feminismus: Das Beispiel Tunesien« formuliert Mestiri kritische Befunde besonders in Bezug auf die liberale Strömung des Feminismus in Tunesien, die sich an der Rehabilitation tradierter Weiblichkeitskonzepte beteiligt. Vor diesem Hintergrund liefert Mestiri programmatische Vorschläge für einen dekolonialen Feminismus auf allen Ebenen: wissenschaftlich-akademisch, philosophisch, aber auch praktisch-politisch.

Eine weitere Perspektive eröffnet Lotfi Mathlouthi mit der Betrachtung des Begriffs der »Komplementarität« als spezifischer Diskursstrategie in der Vorbereitung der neuen Tunesischen Verfassung von 2014. Im Beitrag »Komplementarität oder Geschlechtergleichheit« zeichnet er aus sprachphilosophischer und diskursforschender Perspektive die Debatte um den Entwurf des Artikels 28 in der Verfassung nach. Der Aufsatz bildet zugleich einen Übergang zur männlichkeitsbezogenen Forschung von M. Adel Mtimet, der in »Krise der Männlichkeit. Normativer Widerstand und androgyne Perspektive« die soziokulturellen Transformationen darlegt, die zur Entmystifizierung von Männlichkeit und Erosionen ihrer Idealisierung beigetragen haben. Mtimet identifiziert Androgynie als Ausdrucksweise in der globalen populären Kultur und spannt einen Bogen von der amerikanischen *Beat-Generation* der 1950er Jahre hin zum tunesischen Tänzer und Choreographen Rochdi Belgasmi. Belgasmi, der 2018 im Zuge der fünften Tagung des Forschungsprojekts auch in Lüneburg aufgetreten ist, erinnert in Kunst-Performances wie »Oueld Jellaba« an die tunesische Travestie-Tradition des frühen 20. Jahrhunderts. Mit Stoltenberg argumentiert Mtimet, dass männlicher Chauvinismus sich derzeit modifiziere, modernisiere und als solcher weiter durchsetze, und verdeutlicht Handlungsstrategien normativer männlicher Widerständigkeit.

Einen historisch-sozialwissenschaftlichen Beitrag zu den Transformationen von Geschlechterverhältnissen in Tunesien liefert anschließend Amel Grami. Sie geht zunächst auf die Genese, Effekte und Kritiken des Personenstandsgesetzes (Code du Statut Personnel, CSP) von 1956 ein, um gegenwärtige ambivalente Akteur\*innen und neue emanzipatorische Synergien im postrevolutionären Tu-

nesien zu analysieren – zum einen beleuchtet Grami am Beispiel von Salafistinnen die Beteiligung von Frauen an radikalen islamischen Bewegungen, zum anderen richtet sie ihren Blick auf profeministische männliche Akteure.

Das *zweite Kapitel* »Feminismus/Staatsfeminismus in Tunesien: Geschichte, Erbe und Folgen« versammelt vor allem sozial- und politikwissenschaftliche Forschungsergebnisse. Hafidha Chekir eröffnet es mit einem bewegungsgeschichtlichen Beitrag über die Kämpfe um Frauenrechte in Tunesien. Als Ausgangsthese legt sie dar, inwiefern der Staatsfeminismus Habib Bourguibas sich selbst durch die Anerkennung patriarchaler Normen begrenzte. Die ab den frühen 1980er-Jahren aus gewerkschaftlichen Strukturen hervorgegangene Frauenbewegung, getragen von Studentinnen und Lehrerinnen, zeichnet Chekir vor allem anhand von Gruppen wie *Femmes Démocrates*, ATFD (*Association Tunisienne des Femmes Démocrates*) und AFTURD (*Association des Femmes Tunisiennes Universitaires pour la Recherche et le Développement*) nach. Sie zeigt die Nähe feministischer und menschenrechtlicher Aktivist\*innen auf, bevor sie auf die Bedeutung und Verhandlung, aber auch ausbleibende Effekte der internationalen CEDAW-Konvention in der tunesischen Politik wie auch die politische Partizipation der Zivilgesellschaft eingeht. Als jüngsten historischen Meilenstein behandelt die Autorin die bereits zu beobachtenden Erfolge, aber auch zukünftigen Erfordernisse der Tunesischen Verfassung vom Januar 2014.

Anhand eines staatsnahen Diskursfragments geht Ina Khiari-Loch in ihrem Beitrag »Der staatliche Frauendiskurs in Tunesien in der Ära Ben Ali: Wandel und Kontinuitäten am Beispiel der Zeitschrift *InfoCREDIF*« auf die Zeitschrift des *Centre de Recherches, d'Études, de Documentation et d'Information sur la Femme* ein, die zu Beginn der Ära Ben Ali gegründet wurde. Khiari-Loch rekonstruiert den historischen Kontext der Gründung der *InfoCREDIF* und analysiert Themenschwerpunkte und Deutungsmuster in den Ausgaben, die von der Weltfrauenkonferenz in Peking über eine Politisierung im Zuge der Autokratisierung des Regimes bis hin zur *InfoCREDIF* als Projektionsfläche des Präsidenten Ben Ali und seiner Ehefrau Leila Ben Ali reichen. Die Ablehnung des Feminismus unter Ben Ali beleuchtet Khiari-Loch am Beispiel der Zeitschrift abschließend unter dem Aspekt einer diskursiven Verengung und Vereinnahmung, die mehr von Elitarismus und Uniformismus als von Pluralismus geprägt war.

Im Kontrast dazu geht das *dritte Kapitel* des Bands sprachlichen Alltagspraktiken in Bezug auf Geschlecht in Tunesien nach. Verpackungstexte, körpersprachliche Tanz-Performances, journalistische Artikel sowie öffentliche Proteste im Zuge der Revolution 2010/11 bilden die untersuchten Artefakte, deren Akteur\*innen von Zivilgesellschaft, Medien über Kunst bis Wirtschaft reichen. In seiner Studie »Geschlechterkonstruktionen in Verpackungsaufschriften von

Haushaltspflegeprodukten« untersucht Moez Maataoui sprachkritisch die geschlechts- spezifische werbende Ansprache von Reinigungs- und Waschmitteln als instruktive Sprechakte. »Für die Textsorte Verpackungsaufschrift hat sich die bisherige linguistische Forschung wenig interessiert«, stellt Maataoui fest. Seine Studie bezieht sich auf sprachliche Formen der genusmarkierenden Ansprache im Standardarabischen, aber auch auf bildsprachliche Gemeinsamkeiten mit deutschsprachiger Produktwerbung. Steffi Hobuß behandelt in ihrem Artikel am Beispiel der Performance »Oueld Jellaba« des Tänzers und Choreographen Rochdi Belgasmi den Umgang mit Erinnerung und Geschlechternormen aus sprachphilosophischer, postkolonialer und erinnerungstheoretischer Perspektive. Majdi Chaouachi nimmt die älteste tunesische Tageszeitung in französischer Sprache, *La Presse* in den Blick, insbesondere deren Berichterstattung der Jahre 2011 bis Ende 2013 über islamistische Versuche, Frauenrechte und historische Errungenschaften wie den CSP wieder zu nivellieren. Grundlegend legt Chaouachi in »Äußerungen zum Thema ›Frau‹ im Pressediskurs Tunesiens nach 2010/2011« dar, wie islamistische Kräfte die Tunesische Revolution als Erschütterung der seit Bourguiba bestehenden Ordnung interpretieren, mit der sich alle Errungenschaften von Frauen nach der Kolonialzeit infrage stellen ließen. Die Reaktion des Journalismus hierauf, eine erinnernde Haltung in Bezug auf Frauenrechte als auch eine mahnende gegenüber den Gefahren des Islamismus einzunehmen, beschreibt Chaouachi als neu. Eine weitere Sphäre des öffentlichen Diskurses schlüsselt am Ende des dritten Kapitels Imke Horstmannshoff in ihrem Beitrag zu Dimensionen der Performativen Demokratie während der Tunesischen Revolution auf. Ausgehend von Elżbieta Matynias soziologischem Ansatz der Dynamik kultureller Ordnung fokussiert die Analyse auf die Proteste zwischen Dezember 2010 und März 2011, wobei Formen performativer Initiativen, die Entstehung eines öffentlichen Raumes und dessen karnevalistische Elemente dargelegt werden. Stets im Blick bleiben bei Horstmannshoff die Bürger\*innen als lokale Akteur\*innen demokratischer Äußerungen und Strukturen, deren gewaltlose Proteste performativ (nach-)wirkten. Zugleich nimmt sie mit ihrem Beitrag eine kritische Erweiterung am Konzept der Performativen Demokratie selbst vor.

Der *vierte Teil* des Bandes erarbeitet im Sinne einer kritischen Rezeptions- und Repräsentationsforschung sowie im Anschluss an den tunesisch-deutschen Austausch der Forschungsgruppe deutsche Presse- und förderpolitische Perspektiven auf Geschlecht in Tunesien. Am Anfang dieser Analysen setzt Lina Brink den Schwerpunkt auf Transformationen repräsentativer Ordnungen. Am Beispiel des Pressediskurses um protestierende Frauen klärt sie Möglichkeiten mediatisierter Anerkennung mit postkolonial-feministischen Theorien. Speziell die Fe-

men-Proteste im Zuge der aktivistischen Proteste von Amina Tyler seit 2013 stehen im Mittelpunkt der Berichterstattung und somit der Analyse. Als Ergebnis stellt Brink eine Verschiebung innerhalb der Repräsentation von Weiblichkeit fest, deren Aufwertung allerdings an die Betonung eines selbstbestimmt gestalteten Äußeren gekoppelt ist, sofern es mit westlichen Schönheitsidealen übereinstimmt. Die mediale Herstellung von Männlichkeit knüpfe hingegen an »etablierte Orientkonstruktionen« an und erzeuge Distanz anstelle von Identifikationsmöglichkeiten. Abir Tarssims Beitrag »Genderspezifische Förderung durch deutsche politische Stiftungen in Tunesien: eine Bestandsaufnahme« erhellt anhand von Interviews mit Stiftungsvertreter\*innen und Projektverantwortlichen sowie feldforschenden Teilnahmen den Umfang und die Inhalte von Genderthemen in der deutschen Stiftungsarbeit in Tunesien. Den Fragen nach der Förderung von Gruppen und Veranstaltungen ebenso wie nach Kooperationen geht Tarssim am Beispiel von sechs Stiftungen aus einem breiten politischen Spektrum nach. Dabei werde kaum über Zweigeschlechtlichkeit hinausgedacht; »wird Gender gesagt, handelt es sich überwiegend um Frauen und ihre Förderung«. Neben der Vernachlässigung weiterer benachteiligter Geschlechter erfolge eine gendersensible Stiftungsarbeit zudem nicht in allen Bereichen aller Projekte, in denen sich Praktiken der Wahrnehmung von Deutungshoheit wahrnehmen lassen wie auch der Bedarf nach intersektionalen Kenntnissen identifiziert werden kann. Aus einer erweiterten intersektionalen Perspektive nähert sich Katharina Alexi abschließend deutschsprachigen journalistischen und wissenschaftlichen Erzählungen über zeitgenössische Protestmusik in Tunesien. Ähnlich wie in Brinks Analyse bemerkt sie im Material zunächst eine Auswahl nur weniger Akteur\*innen. Alexi behandelt kontextanalytisch bisher wenig beachtete Songs und Statements der beiden am stärksten popularisierten Künstler\*innen El Général und Emel Mathlouthi und stellt ausgehend hiervon die »tückische Strategie« (Ina Kerner) fest, dass in journalistischen Portraits, aber auch in der kulturwissenschaftlichen Forschung z.T. problematische wie antisemitische Äußerungen durch Bezüge auf Geschlecht oder gar Feminismus erzählerisch »ausgeglichen« oder gar nicht erst thematisiert werden – während andere Künstler\*innen der tunesischen Musikszene fast gänzlich unsichtbar bleiben, weshalb der untersuchte Ausschnitt als Phantasma verstanden wird.

Das *finfte Kapitel* umfasst weitere Studien zu Literatur, Film und Kunst. Sven Kramers Beitrag »Ägyptische Finsternis. Gewaltverhältnisse und Subjektkonstitution im »Buch Franza« von Ingeborg Bachmann stellt einen Exkurs dar, dessen Erkenntnisse über Geschlechterverhältnisse sowie die symbolisch aufgeladenen Orte der Wüste und Zivilisation nicht in der Analyse der literarischen Darstellung eines Landes enden. Kramer folgt Sara Lennox, derzufolge die

»Auffassung von Nordafrika als einem Ort des orientalischen Andersseins, das Franza vor Europa retten kann, [...] als Produkt von romantischen weißen Fantasien zu lesen« ist.<sup>5</sup> Zugleich zeigen die Ausführungen zu dem zivilisationskritisch lesbaren Romanfragment Ingeborg Bachmanns aus dem *Todesarten*-Zyklus aktuelle postkoloniale Konzepte und Diskurse in den Literaturwissenschaften auf. Einen zweiten literaturwissenschaftlichen Beitrag legt Imen Taleb mit ihrer Untersuchung von Shukri El-Mabkhouts Debütroman »Ettalyani« (Der Italiener) vor. Mabkhout, bis 2017 Professor an der Universität von Tunis und Präsident der Université de La Manouba, veröffentlichte 2014 den bisher nur ins Italienische übersetzten Roman, dessen Handlung in den späten 1980er bis frühen 1990er Jahren spielt. Taleb zeigt, inwiefern Mabkhout verschiedene Facetten und Entscheidungen weiblicher Emanzipation, darunter die zur Abtreibung oder Scheidung, sichtbar macht und Motive von Körperlichkeit, Sexualität und Erotik einen hohen Stellenwert einnehmen. Anhand der näheren Auseinandersetzung mit der weiblichen Hauptfigur Zina, einer feministischen jungen Akademikerin, wird auch das politische Erbe Tunesiens verhandelt, denn sie wird geschildert als »die Tochter von Bourguiba, der die Frauen stärker und dominanter gegenüber den Ehemännern, den Vätern und den Brüdern gemacht hat«.<sup>6</sup> Talebs Untersuchung ist in Bezug auf die Ausgestaltung weiblicher Identität und der Geschlechterverhältnisse ebenso aufschlussreich wie hinsichtlich weiterer intersektionaler Aspekte, die das Verhältnis von Hauptstadt und Peripherie betreffen.

Narrative Konstruktionen und Transformationen von Geschlecht analysiert auch der dritte literaturwissenschaftliche Beitrag von Idris Chouk. Anhand von Erzählwerken der Autorinnen Amal Mokhtar und Hayat Rais, nämlich der Kurzgeschichte »Geheimrituale und meine Leidensgeschichte« (2009, Rais) sowie den Romanen »Toast aufs Leben« (1993, Mokhtar) und »Der Schaukelstuhl« (2003/2016, Mokhtar) untersucht Chouk Polyperspektivität und Selbstfragmentierung gleichermaßen wie die subversive Dekonstruktion weiblicher Identitätszuschreibungen. Malek Ouakaouis Beitrag »Genderperspektiven im tunesischen Film« führt in die jüngere tunesische Filmgeschichte ein. Besonders hebt Ouakaoui den Film »*Millefeuille*« von Nouri Bouzid aus der Revolutionszeit hervor, in dem sich zwei weibliche Hauptfiguren für einen Wechsel des politischen Re-

---

5 Sara Lennox: »White Ladies« und »Dark Continents«. Ingeborg Bachmanns *Todesarten*-Projekt aus postkolonialer Sicht, in: Monika Albrecht und Dirk Götsche (Hg.): *Über die Zeit schreiben. Literatur- und kulturwissenschaftliche Essays zu Ingeborg Bachmanns Todesarten-Projekt*, Würzburg 1998, S. 13-31, S. 19.

6 Mabḥūt, Šukrī: *al-Ṭalyānī*. Riwāyah, Tūnis: Dār al-Tanwīrlil-Ṭibā'ahwa-al-Našr 2014, S. 47.

gimes, aber nicht für ihre eigenen Rechte einsetzen. Ouakaouis Einschätzung in Bezug auf medial vermittelte Emanzipation ist ernüchternd und ambivalent angesichts neuer (Produktions-)möglichkeiten, messbar auch beteiligten Akteur\*innen wie an Regisseurinnen, aber auch aufrechterhaltener visueller vergeschlechtlicher Muster. Einen ähnlichen »Zwischen(zu)stand in Zeiten des politisch-kulturellen Umbruchs« stellt Nina Glaab in ihrem Beitrag »Kunst in Transformation – das *Dream City*-Festival als Heterotopie« zu aktivistischen Potenzialen (und Problemen) gegenwärtiger künstlerischer Praktiken fest, mit dem unser Band schließt. Glaab rekonstruiert die Gründung, Wirkung und Transformation des Kunstfestivals *Dream City* in Tunis seit 2007 und erläutert dessen Erzeugungsmöglichkeiten einer neuen Öffentlichkeit sowie seine Existenzbedingungen als sozialer Raum mit Foucaults Konzept der Heterotopie. Ihre Schlussbetrachtung »Ziel dieser Heterotopie ist es, der utopisch erscheinenden Vision der Wirklichkeit [...] näherzukommen« trifft rückblickend auf viele der in den Beiträgen dieses Bandes untersuchten Prozesse und Akteur\*innen und auch die Ziele unseres tunesisch-deutschen Forschungsprojekts zu: Auch und gerade kollaborative Wissenschaft verändert die jeweils eigenen Perspektiven und Prozesse und bleibt damit nicht auf eine Beschreibung des Bestehenden beschränkt.

In allen Texten dieses Bandes geht es in irgendeiner Form um die Beobachtung der Spannungen zwischen traditionalistischen und progressiven gesellschaftlichen Kräften in einem globalen Kontext, die manchmal eher als Dialoge, manchmal eher als Konfrontationen stattfinden und sogar die Form von Krieg und Gewalt annehmen können. Wie nach Horkheimer alle Kultur an der geschichtlichen Dynamik des Aufrechterhaltens oder aber Sprengens bestimmter Gesellschaftsformen beteiligt ist, stellt sie je nach historischer Situation den *Mörtel* eines noch fertigzustellenden Baus, den *Kitt* seiner vielleicht schon zerbrechenden Teile oder den *Sprengstoff* dar, »der das Ganze beim ersten Funken zerreit.«<sup>7</sup> Sowohl Wissenschaftler\*innen als auch Aktivist\*innen sind hier gefragt, um friedvolle Transformationen zu ermöglichen.

*Tunis, Medenine, Lüneburg, Rostock  
im August 2019*

---

7 Horkheimer, Max: Autorität und Familie. In: Ders.: Traditionelle und Kritische Theorie. Fünf Aufsätze, Frankfurt/M.: Fischer Wissenschaft 1992, S. 123-204, hier S. 131.

## **DANK**

Die Herausgeber\*innen danken dem DAAD, der das Projekt »Transformation – Kultur – Geschlecht« während der vierjährigen Laufzeit (1.1.2016 - 31.12.2019) aus Mitteln der Programmlinie »Deutsch-Arabische Transformationspartnerschaft« gefördert hat. Für die gute Zusammenarbeit und die hilfreiche Unterstützung danken wir Renate Dieterich, Anke Bahrani, Judith Laux und Beate Schindler-Kovats.

Unser Dank gilt auch dem transcript Verlag und vor allem »unserer« Projektmanagerin Katharina Wierichs für die gute Betreuung und hilfreiche Unterstützung.

Für die geleistete intensive Arbeit und die vielen Diskussionen danken wir allen Mitgliedern der Forschungsgruppe, an dieser Stelle auch denjenigen, die aus unterschiedlichsten Gründen keinen Beitrag für diesen Sammelband zur Verfügung stellen konnten: Nabila Abbas, Anna Antonakis, Bettina Bock, Franziska Dübgen, Elke Grittmann, Kaouther Karoui, Raja Machfar, Brahim Moussa, Nadia El-Ouerghemmi, Charlotte Schmidt sowie Zeineb Ben Said Cherni als assoziierte Professorin.

Ohne die studentischen Mitarbeiter\*innen Caja Fischer, Johannes Klaffke, Susanne Mühlthaler und Alina Steinborn wäre die intensive und erfolgreiche Projektarbeit nicht möglich gewesen, tausend Dank Euch allen dafür!

Schließlich und vor allem gilt unser tiefer Dank unserem Kollegen Sarhan Dhouib, der in zahlreichen Projekten die tunesisch-deutsche akademische Zusammenarbeit sowie die interkulturelle Philosophie und Verständigung gefördert hat, weiter fördert und als Projektleiter des Projekts »Verantwortung, Gerechtigkeit, Erinnerungskultur« unsere Zusammenarbeit erstmalig initiierte.
